# Supplementary material for: Encapsulation Efficiency and Functional Stability of Cinnamon Essential Oil in Modified β-cyclodextrins: In Vitro and In Silico Evidence
Source: MDPI journal article supplement (doi:10.3390/foods12010045), 2022-12-22
Supplement: s1 [file s1]

## **Supplementary Information**

# **Encapsulation Efficiency and Functional Stability of Cinnamon Essential Oil in Modified $\beta$ -Cyclodextrins: In Vitro and In Silico Evidence**

**Kegang Wu, Tong Zhang \*, Xianghua Chai, Xuejuan Duan, Dong He, Hongpeng Yu, Xiaoli Liu and Zhihua Tao**

School of Chemical Engineering and Light Industry, Guangdong University of Technology, Guangzhou, 511443, China

\* Correspondence: fsezzz308364445@163.com

## S1. Experimental methods

### S1.1. The effects of the preparation conditions on the EE of $\beta$ -CD-ICs

The  $\beta$ -CDs solution was prepared using hot distilled water with water:  $\beta$ -CD ratio of 9:1. CEO solution was prepared using absolute alcohol. The CEO solution was injected into  $\beta$ -CDs solution.

The  $\beta$ -CD-ICs preparation conditions were controlled to evaluate the influences of the oil to wall ratio (1:4, 1:6, 1:8, 1:10, and 1:12) on the EE at 60 °C and 300 rpm for 2 h, the time (0.5, 1.0, 1.5, 2.0, 2.5, and 3.0 h) on the EE with the oil ratio of 1:10 at 60 °C and 300 rpm, and the temperature (30, 40, 50, 60, and 70 °C) on the EE with the oil ratio of 1:10 at 300 rpm for 2.5 h.

### S1.2. The effects of the preparation conditions on the EE of Mal-ICs

The Mal-ICs preparation conditions were controlled to evaluate the influences of the oil to wall ratio (1:8, 1:10, 1:12, 1:14, and 1:16) on the EE at 30 °C and 300 rpm for 2 h, the time (0.5, 1.0, 1.5, 2.0, 2.5, and 3.0 h) on the EE with the oil/wall ratio of 1:12 at 30 °C and 300 rpm, and the temperature (15, 20, 25, 30, 35, and 40 °C) on the EE with the oil ratio of 1:12 at 300 rpm for 1.5 h.

### S1.3. The effects of the preparation conditions on the EE of CM-ICs

The CM-ICs preparation conditions were controlled to evaluate the influences of the oil to wall ratio (1:6, 1:8, 1:10, 1:12, 1:14, and 1:16) on the EE at 30 °C and 300 rpm for 2 h, the time (0.5, 1.0, 1.5, 2.0, 2.5, and 3.0 h) on the EE with the oil/wall ratio of 1:16 at 30 °C and 300 rpm, and the temperature (15, 20, 25, 30, 35, and 40 °C) on the EE with the oil ratio of 1:16 at 300 rpm for 2 h.

### S1.4. The effects of the preparation conditions on the EE of HP-ICs

The HP-ICs preparation conditions were controlled to evaluate the influences of the oil to wall ratio (1:4, 1:6, 1:8, 1:10, and 1:12) on the EE at 30 °C and 300 rpm for 2 h, the time (0.5, 1.0, 1.5, 2.0, and 2.5 h) on the EE with the oil/wall ratio of 1:8 at 30 °C and 300 rpm, and the temperature (20, 30, 40, 50, and 60 °C) on the EE with the oil ratio of 1:8 at 300 rpm for 1 h.

### S1.5. The effects of the preparation conditions on the EE of DM-ICs

The DM-ICs preparation conditions were controlled to evaluate the influences of the oil to wall ratio (1:4, 1:6, 1:8, 1:10, 1:12, and 1:14) on the EE at 30 °C and 300 rpm for 2 h, the time (0.5, 1.0, 1.5, 2.0, 2.5, and 3.0 h) on the EE with the oil/wall ratio of 1:12 at 30 °C and 300 rpm, and the temperature (20, 30, 40, 50, and 60 °C) on the EE with the oil ratio of 1:12 at 300 rpm for 2 h.

## S2. Effects of preparation conditions on the encapsulation efficiency (EE)

### S2.1. $\beta$ -CD-ICs

**Figure S1** (A) showed that the EE of  $\beta$ -CD-ICs reached the highest yield at the oil/wall material mass ratio of 1:10 (w/w). **Figure S1** (B) showed that the EE of  $\beta$ -CD-ICs reached the highest yield at 2.5 h. **Figure S1** (C) showed that the EE of  $\beta$ -CD-ICs reached the highest yield at 50 °C.

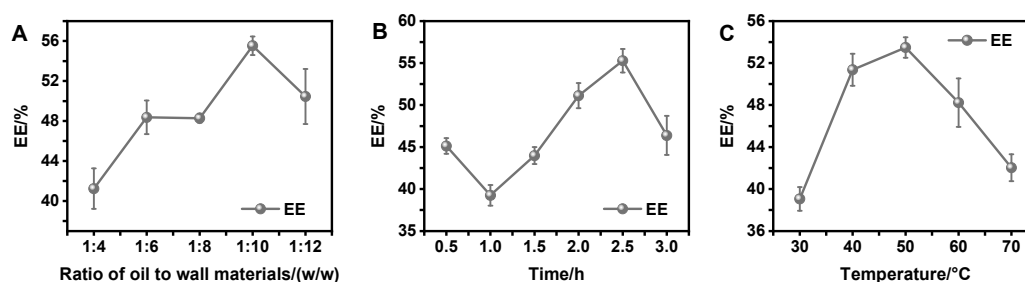

**Figure S1.** Effect of the (A) ratio of oil to wall materials, (B) time, (C) temperature on the EE of  $\beta$ -CD-ICs.

As shown in **Table S1**, when the mass ratio of oil to wall materials, time, and temperature conditions were 1:10 (w/w), 3 h, and 40 °C, respectively, the EE reached the highest value.

**Table S1.** The design and results of the orthogonal formulation of  $\beta$ -CD-ICs<sup>a</sup>

| Numbers        | Factors  |          |          |       | EE%          |
|----------------|----------|----------|----------|-------|--------------|
|                | A        | B        | C        | D     |              |
| 1              | 1 (1:8)  | 1 (2h)   | 1 (40°C) | 1     | 56.90 ± 2.31 |
| 2              | 1        | 2 (2.5h) | 2 (50°C) | 2     | 42.96 ± 1.23 |
| 3              | 1        | 3 (3h)   | 3 (60°C) | 3     | 47.68 ± 4.20 |
| 4              | 2 (1:10) | 1        | 2        | 3     | 37.12 ± 1.32 |
| 5              | 2        | 2        | 3        | 1     | 38.52 ± 1.38 |
| 6              | 2        | 3        | 1        | 2     | 57.37 ± 1.23 |
| 7              | 3 (1:12) | 1        | 3        | 2     | 45.39 ± 1.76 |
| 8              | 3        | 2        | 1        | 3     | 55.68 ± 2.87 |
| 9              | 3        | 3        | 2        | 1     | 52.62 ± 1.90 |
| k <sub>1</sub> | 49.18    | 46.47    | 56.65    | 49.35 |              |
| k <sub>2</sub> | 44.34    | 45.72    | 44.23    | 48.57 |              |
| k <sub>3</sub> | 51.23    | 55.56    | 43.86    | 46.83 |              |
| R              | 6.89     | 9.84     | 12.79    | 2.52  |              |

<sup>a</sup>Note: A means the ratio of oil to wall materials, B means the time value, C means the temperature values, and D means blank column. k<sub>1</sub> is the mean values for level 1 of each factor; k<sub>2</sub> is the mean values for level 2 of each factor; k<sub>3</sub> is the mean values for level 3 of each factor. R is the difference between the maximum and minimum of the encapsulation efficiency (EE) for every level. R = max (k<sub>i</sub>) – min (k<sub>i</sub>).

## S2.2. Mal-ICs

**Figure S2** (A) showed that the EE of Mal-ICs reached the highest yield at the oil/wall material mass ratio of 1:12 (mol/mol). **Figure S2** (B) showed that the EE of Mal-ICs reached the highest yield at 1.5 h. **Figure S2** (C) showed that the EE of Mal-ICs reached the highest yield at 15 °C.

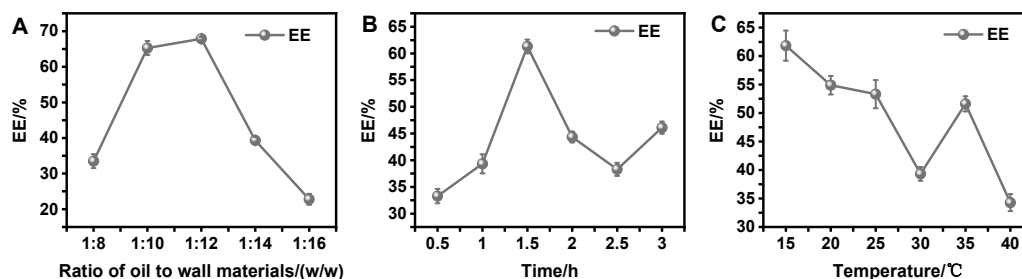

**Figure S2.** Effect of the (A) ratio of oil to wall materials, (B) time, (C) temperature on the EE of Mal-ICs.

As shown in **Table S2**, when the mass ratio of oil to wall materials, time, and temperature conditions were 1:10 (w/w), 1 h, and 80 °C, respectively, the EE reached the highest value.

**Table S2.** The design and results of the orthogonal formulation of Mal-ICs<sup>a</sup>

| Numbers        | Factors  |          |          |       | EE%          |
|----------------|----------|----------|----------|-------|--------------|
|                | A        | B        | C        | D     |              |
| 1              | 1 (1:10) | 1 (1.5h) | 1 (15°C) | 1     | 68.90 ± 2.31 |
| 2              | 1        | 2 (2h)   | 2 (20°C) | 2     | 42.96 ± 1.23 |
| 3              | 1        | 3 (3h)   | 3 (25°C) | 3     | 47.68 ± 4.20 |
| 4              | 2 (1:12) | 1        | 2        | 3     | 37.12 ± 1.32 |
| 5              | 2        | 2        | 3        | 1     | 38.52 ± 1.38 |
| 6              | 2        | 3        | 1        | 2     | 35.56 ± 1.12 |
| 7              | 3 (1:14) | 1        | 3        | 2     | 45.39 ± 1.76 |
| 8              | 3        | 2        | 1        | 3     | 55.68 ± 2.87 |
| 9              | 3        | 3        | 2        | 1     | 52.62 ± 1.90 |
| k <sub>1</sub> | 53.18    | 50.47    | 53.38    | 53.35 |              |
| k <sub>2</sub> | 37.06    | 45.72    | 44.23    | 41.30 |              |
| k <sub>3</sub> | 51.23    | 45.28    | 43.86    | 46.82 |              |
| R              | 14.16    | 5.19     | 9.52     | 12.04 |              |

<sup>a</sup>Note: A means the ratio of oil to wall materials, B means the time value, C means the temperature values, and D means blank column. k<sub>1</sub> is the mean values for level 1 of each factor; k<sub>2</sub> is the mean values for level 2 of each factor; k<sub>3</sub> is the mean values for level 3 of each factor. R is the difference between the maximum and minimum of the encapsulation efficiency (EE) for every level. R = max (k<sub>i</sub>) – min (k<sub>i</sub>).

### S2.3. CM-ICs

**Figure S3** (A) showed that the EE of CM-ICs reached the highest yield at the oil/wall material mass ratio of 1:16 (mol/mol). **Figure S3** (B) showed that the EE of CM-ICs reached the highest yield at 2 h. **Figure S3** (C) showed that the EE of CM-ICs reached the highest yield at 30 °C.

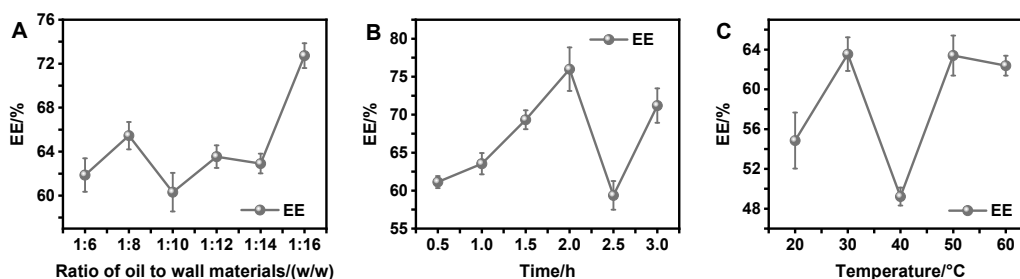**Figure S3.** Effect of the (A) ratio of oil to wall materials, (B) time, (C) temperature on the EE of CM-ICs.

As shown in **Table S3**, when the mass ratio of oil to wall materials, time, and temperature conditions were 1:8 (w/w), 2 h, and 30 °C, respectively, the EE of CM-ICs reached the highest value.

**Table S3.** The design and results of the orthogonal formulation of CM-ICs<sup>a</sup>

| Numbers        | Factors  |          |          |       | EE%          |
|----------------|----------|----------|----------|-------|--------------|
|                | A        | B        | C        | D     |              |
| 1              | 1 (1:8)  | 1 (1.5h) | 1 (20°C) | 1     | 68.90 ± 2.31 |
| 2              | 1        | 2 (2h)   | 2 (30°C) | 2     | 72.73 ± 1.69 |
| 3              | 1        | 3 (3h)   | 3 (50°C) | 3     | 47.68 ± 4.20 |
| 4              | 2 (1:12) | 1        | 2        | 3     | 39.12 ± 1.32 |
| 5              | 2        | 2        | 3        | 1     | 71.52 ± 0.83 |
| 6              | 2        | 3        | 1        | 2     | 53.26 ± 1.17 |
| 7              | 3 (1:16) | 1        | 3        | 2     | 45.39 ± 1.76 |
| 8              | 3        | 2        | 1        | 3     | 55.68 ± 2.87 |
| 9              | 3        | 3        | 2        | 1     | 62.18 ± 1.97 |
| k <sub>1</sub> | 63.10    | 51.14    | 59.28    | 67.53 |              |
| k <sub>2</sub> | 54.63    | 66.64    | 57.13    | 57.13 |              |
| k <sub>3</sub> | 54.42    | 54.37    | 54.86    | 47.49 |              |
| R              | 8.68     | 15.5     | 4.42     | 20.04 |              |

<sup>a</sup>Note: A means the ratio of oil to wall materials, B means the time value, C means the temperature values, and D means blank column. k<sub>1</sub> is the mean values for level 1 of each factor; k<sub>2</sub> is the mean values for level 2 of each factor; k<sub>3</sub> is the mean values for level 3 of each factor. R is the difference between the maximum and minimum of the encapsulation efficiency (EE) for every level. R = max (k<sub>i</sub>) – min (k<sub>i</sub>).

#### S2.4. HP-ICs

**Figure S4** (A) showed that the EE of HP-ICs reached the highest yield at the oil/wall material mass ratio of 1:8 (mol/mol). **Figure S4** (B) showed that the EE of HP-ICs reached the highest yield at 1 h. **Figure S4** (C) showed that the EE of HP-ICs reached the highest yield at 50 °C.

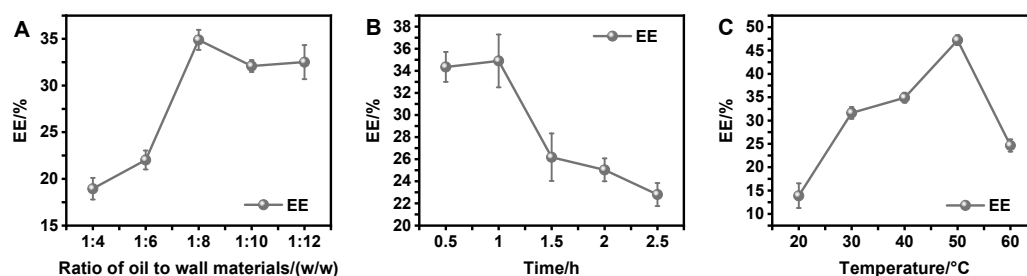

**Figure S4.** Effect of the (A) ratio of oil to wall materials, (B) time, (C) temperature on the EE of HP-ICs

As shown in **Table S4**, when the mass ratio of oil to wall materials, time, and temperature conditions were 1:10 (w/w), 1.5 h, and 30 °C, respectively, the EE reached the highest value.

**Table S4.** The design and results of the orthogonal formulation of HP-ICs <sup>a</sup>

| Numbers        | Factors  |          |          |       | EE%          |
|----------------|----------|----------|----------|-------|--------------|
|                | A        | B        | C        | D     |              |
| 1              | 1 (1:8)  | 1 (0.5h) | 1 (30°C) | 1     | 34.79 ± 1.32 |
| 2              | 1        | 2 (1h)   | 2 (40°C) | 2     | 30.95 ± 3.25 |
| 3              | 1        | 3 (1.5h) | 3 (50°C) | 3     | 25.27 ± 1.98 |
| 4              | 2 (1:10) | 1        | 2        | 3     | 35.29 ± 1.36 |
| 5              | 2        | 2        | 3        | 1     | 38.95 ± 1.03 |
| 6              | 2        | 3        | 1        | 2     | 43.88 ± 2.49 |
| 7              | 3 (1:12) | 1        | 3        | 2     | 28.80 ± 3.67 |
| 8              | 3        | 2        | 1        | 3     | 34.40 ± 2.12 |
| 9              | 3        | 3        | 2        | 1     | 32.65 ± 1.44 |
| k <sub>1</sub> | 30.34    | 32.96    | 37.69    | 35.46 |              |
| k <sub>2</sub> | 39.37    | 34.77    | 32.96    | 34.54 |              |
| k <sub>3</sub> | 31.95    | 33.93    | 31.01    | 31.65 |              |
| R              | 9.04     | 1.80     | 6.69     | 3.81  |              |

<sup>a</sup>Note: A means the ratio of oil to wall materials, B means the time value, C means the temperature values, and D means blank column. k<sub>1</sub> is the mean values for level 1 of each factor; k<sub>2</sub> is the mean values for level 2 of each factor; k<sub>3</sub> is the mean values for level 3 of each factor. R is the difference between the maximum and minimum of the encapsulation efficiency (EE) for every level. R = max (k<sub>i</sub>) – min (k<sub>i</sub>).

## S2.5. DM-ICs

**Figure S5** (A) showed that the EE of DM-ICs reached the highest yield at the oil/wall material mass ratio of 1:12 (w/w). **Figure S5** (B) showed that the EE of DM-ICs reached the highest yield at 2 h. **Figure S5** (C) showed that the EE of DM-ICs reached the highest yield at 50 °C.

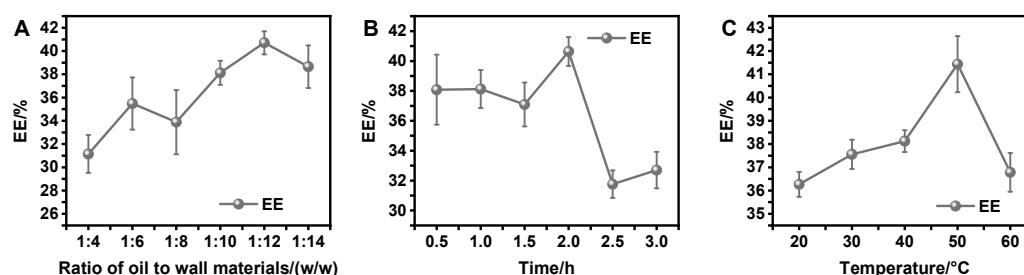

**Figure S5.** Effect of the (A) ratio of oil to wall materials, (B) time, (C) temperature on the EE of DM-ICs

As shown in **Table S5**, when the mass ratio of oil to wall materials, time, and temperature conditions were 1:12 (w/w), 1 h, and 50 °C, respectively, the EE of DM-ICs reached the highest value.

**Table S5.** The design and results of the orthogonal formulation of DM-ICs<sup>a</sup>

| Numbers        | Factors  |          |          |       | EE%          |
|----------------|----------|----------|----------|-------|--------------|
|                | A        | B        | C        | D     |              |
| 1              | 1 (1:10) | 1 (0.5h) | 1 (30°C) | 1     | 42.73 ± 1.17 |
| 2              | 1        | 2 (1h)   | 2 (40°C) | 2     | 21.37 ± 2.35 |
| 3              | 1        | 3 (2h)   | 3 (50°C) | 3     | 34.14 ± 1.38 |
| 4              | 2 (1:12) | 1        | 2        | 3     | 45.42 ± 1.86 |
| 5              | 2        | 2        | 3        | 1     | 49.90 ± 0.85 |
| 6              | 2        | 3        | 1        | 2     | 41.54 ± 2.46 |
| 7              | 3 (1:14) | 1        | 3        | 2     | 26.95 ± 3.07 |
| 8              | 3        | 2        | 1        | 3     | 39.99 ± 1.12 |
| 9              | 3        | 3        | 2        | 1     | 27.16 ± 0.74 |
| k <sub>1</sub> | 32.75    | 38.37    | 41.42    | 39.93 |              |
| k <sub>2</sub> | 45.62    | 37.08    | 31.32    | 29.95 |              |
| k <sub>3</sub> | 31.37    | 34.28    | 37.00    | 39.85 |              |
| R              | 14.25    | 4.09     | 10.10    | 9.97  |              |

<sup>a</sup>Note: A means the ratio of oil to wall materials, B means the time value, C means the temperature values, and D means blank column. k<sub>1</sub> is the mean values for level 1 of each factor; k<sub>2</sub> is the mean values for level 2 of each factor; k<sub>3</sub> is the mean values for level 3 of each factor. R is the difference between the maximum and minimum of the encapsulation efficiency (EE) for every level. R = max (k<sub>i</sub>) – min (k<sub>i</sub>).
